# Supplementary material for: Impact of SARS-CoV-2 Alpha and Gamma Variants among Symptomatic Pregnant Women: A Two-Center Retrospective Cohort Study between France and Brazil
Source: MDPI journal article supplement (doi:10.3390/jcm11092663), 2022-05-09
Supplement: s1 [file s1]

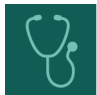

# SUPPLEMENTARY MATERIAL

## **Impact of SARS-CoV-2 Alpha and Gamma Variants among Symptomatic Pregnant Women: A Two-Center Cohort Study between France and Brazil**

**Table S1.** Baseline characteristics of COVID-19 symptomatic pregnant women during the “wild-type period” and “variant period” detailed by hospital.

| Characteristic                                                   | Overall (1 February 2020–1 June 2021) | Wild-Type Period (1 February 2020–13 February 2021) |                                       |                                      | Variant period (14 February 2021–1 June 2021) |                                           |                                          |
|------------------------------------------------------------------|---------------------------------------|-----------------------------------------------------|---------------------------------------|--------------------------------------|-----------------------------------------------|-------------------------------------------|------------------------------------------|
|                                                                  |                                       | Overall                                             | Béclère Hospital (France) (Wild-Type) | Sepaco Hospital (Brazil) (Wild-Type) | Overall                                       | Béclère Hospital (France) (Alpha Variant) | Sepaco Hospital (Brazil) (Gamma Variant) |
| Total, N (%)                                                     | N=151/151                             | N=126/126                                           | N=68/126                              | N=58/126                             | N=25/25                                       | N=11/25                                   | N=14/25                                  |
| Mean age, years mean (IQR)                                       | 31.0 (28.0, 35.0)                     | 31.0 (28.0, 34.0)                                   | 32.0 (29.0, 35.0)                     | 29.5 (26.0, 34.0)                    | 33.0 (30.0, 36.0)                             | 31.0 (29.5, 34.0)                         | 35.0 (32.2, 38.0)                        |
| Ethnic group, N (%)                                              |                                       |                                                     |                                       |                                      |                                               |                                           |                                          |
| White                                                            | 85 / 151 (56%)                        | 70/126 (56%)                                        | 28/68 (41%)                           | 42/58 (72%)                          | 15/25 (60%)                                   | 3/11 (27%)                                | 12/14(86%)                               |
| Black                                                            | 27 / 151 (18%)                        | 24/126 (19%)                                        | 24/68 (35%)                           | 0/58 (0%)                            | 3/25 (12%)                                    | 2/11 (18%)                                | 1/14 (7.1%)                              |
| Maghrebien                                                       | 18 / 151 (12%)                        | 13/126 (10%)                                        | 13/68 (19%)                           | 0/58 (0%)                            | 5/25 (20%)                                    | 5/11 (45%)                                | 0/14 (0%)                                |
| Hispanic                                                         | 20 / 151 (13%)                        | 18/126 (14%)                                        | 2/68 (2.9%)                           | 16/58 (28%)                          | 2/25 (8.0%)                                   | 1/11 (9.1%)                               | 1/14 (7.1%)                              |
| Asian                                                            | 1 / 151 (0.7%)                        | 1/126 (0.8%)                                        | 1/68 (1.5%)                           | 0/58 (0%)                            | 0/25 (0%)                                     | 0/11 (0%)                                 | 0 14 (0%)                                |
| Pre pregnancy BMI, kg/m <sup>2</sup> mean (IQR)                  | 26.2 (23.3, 30.3)                     | 26. (23.0, 29.9)                                    | 25.0 (22.7, 29.0)                     | 27.1 (24.7, 30.3)                    | 29.0 (26.0, 35.0)                             | 26.0 (23.5, 27.5)                         | 31.2 (29.3, 35.2)                        |
| Parity, N (%)                                                    |                                       |                                                     |                                       |                                      |                                               |                                           |                                          |
| Nulliparous                                                      | 73/151 (48.3%)                        | 59/126(46.9%)                                       | 32/68 (47.1%)                         | 27/58 (46.6%)                        | 14/25 (56.0%)                                 | 5/11 (45.5%)                              | 9/14 (64.3%)                             |
| Multiparous                                                      | 78/151 (51.7%)                        | 67/126(53.1%)                                       | 36/68 (52.9%)                         | 31/58 (53.4%)                        | 11/25 (44.0%)                                 | 6/11 (54.5%)                              | 5/14 (35.7%)                             |
| Current smoking, N(%)                                            | 16/151 (11%)                          | 13/126 (10%)                                        | 7/68 (10%)                            | 6/58 (10%)                           | 3/25 (12%)                                    | 2/11 (18%)                                | 1/14 (7.1%)                              |
| Pre-existing medical conditions, N(%)                            | 38/151 (25%)                          | 29/126 (23%)                                        | 15/68 (22%)                           | 14/58 (24%)                          | 9/25 (36%)                                    | 4/11 (36%)                                | 5/14 (36%)                               |
| Chronic hypertension                                             | 14/151 (9.3%)                         | 13/126 (10%)                                        | 3/68 (4.4%)                           | 10/58 (17%)                          | 1/25 (4.0%)                                   | 0/11 (0%)                                 | 1/14 (7.1%)                              |
| Diabetes mellitus                                                | 1/151 (0.7%)                          | 0/126 (0%)                                          | 0/68 (0%)                             | 0/58 (0%)                            | 1/25 (4.0%)                                   | 0/11 (0%)                                 | 1/14 (7.1%)                              |
| Pulmonary disease (including asthma)                             | 11/151 (7.3%)                         | 8/126 (6.3%)                                        | 4/68 (5.9%)                           | 4/58 (6.9%)                          | 3/25 (12%)                                    | 2/11 (18%)                                | 1/14 (7.1%)                              |
| Others                                                           | 12/151 (7.9%)                         | 8/126 (6.3%)                                        | 8/68 (11.8%)                          | 0/68 (0%)                            | 4/25 (16%)                                    | 2/11 (18.2%)                              | 2/14 (14.3%)                             |
| Multiple pregnancies, N (%)                                      | 8/151 (5.3%)                          | 7/126 (5.6%)                                        | 5/68 (7.4%)                           | 2/58 (3.4%)                          | 1/25 (4.0%)                                   | 1/ 11 (9.1%)                              | 0/ 14 (0%)                               |
| COVID-19-related information                                     |                                       |                                                     |                                       |                                      |                                               |                                           |                                          |
| Gestational age at the time of positive RT-PCR, weeks mean (IQR) | 32 (26, 35)                           | 31 (26, 35)                                         | 32 (26, 35)                           | 31 (26, 36)                          | 34 (32, 36)                                   | 34 (33, 35)                               | 33 (32, 36)                              |
| Hospital admission for COVID-19-related illness, N (%)           | 57/151 (38%)                          | 43/126 (34%)                                        | 21/68 (31%)                           | 22/58 (38%)                          | 14/25 (56%)                                   | 5/11 (45%)                                | 9/14 (64%)                               |

BMI: body mass index; IQR: interquartile range.

**Table S2.** Disease severity, obstetrical and neonatal outcomes among symptomatic pregnant women during the “wild-type period” and “variant period” (Alpha) in Bécélère Hospital (Clamart, France).

| Outcomes in Clamart (France)                  | Wild-Type Period                 | Alpha Period                 | Univariate Analysis |            |         |
|-----------------------------------------------|----------------------------------|------------------------------|---------------------|------------|---------|
|                                               | 1 February 2020–13 February 2021 | 14 February 2021–1 June 2021 |                     |            |         |
|                                               | Women N=68                       | Women N=11                   | OR                  | 95% CI     | p-Value |
|                                               | Neonates N=71                    | Neonates N=10                |                     |            |         |
| Severe to critical infection according to WHO | 17/68 (25.0%)                    | 6/11 (54.6%)                 | 3.25                | 0.70, 15.6 | 0.13    |
| Composite adverse obstetric outcome           | 27/68 (39.7%)                    | 7/11 (63.6%)                 | 2.45                | 0.63, 10.8 | 0.2     |
| Composite adverse neonatal outcome            | 27/71 (38.0%)                    | 3/10 (30.0%)                 | 0.50                | 0.09, 2.17 | 0.4     |

WHO World Health Organization; OR: odds ratio; CI: confidence interval.

**Table S3.** Disease severity, obstetrical and neonatal outcomes among symptomatic pregnant women during the “wild-type period” and “variant period” (Gamma) in Sepaco Hospital (Sao Paulo, Brazil)

| Outcomes in Sao Paulo (Brazil)                | Wildtype Period                  | Gamma Period                 | Univariate Analysis |            |         |
|-----------------------------------------------|----------------------------------|------------------------------|---------------------|------------|---------|
|                                               | 1 February 2020–13 February 2021 | 14 February 2021–1 June 2021 |                     |            |         |
|                                               | Women N=58                       | Women N=14                   | OR                  | 95% CI     | p-Value |
|                                               | Neonates N=60                    | Neonates N=14                |                     |            |         |
| Severe to critical infection according to WHO | 5/58 (8.6%)                      | 7/14 (50%)                   | 11.8                | 2.46, 72.3 | 0.003   |
| Composite adverse obstetric outcome           | 24/58 (41%)                      | 8/14 (57%)                   | 1.06                | 0.23, 4.87 | >0.9    |
| Composite adverse neonatal outcome            | 15/60 (25%)                      | 7/14 (50%)                   | 2.69                | 0.77, 9.42 | 0.12    |

WHO World Health Organization; OR: odds ratio; CI: confidence interval.
